# Supplementary material
Source: Springer Nature journal article supplement (https://www.springermedizin.de/resource/supplementary/12955_2013_1312_MOESM1_ESM.pdf/9559538)
Supplement: MOESM1 [file 9559538]

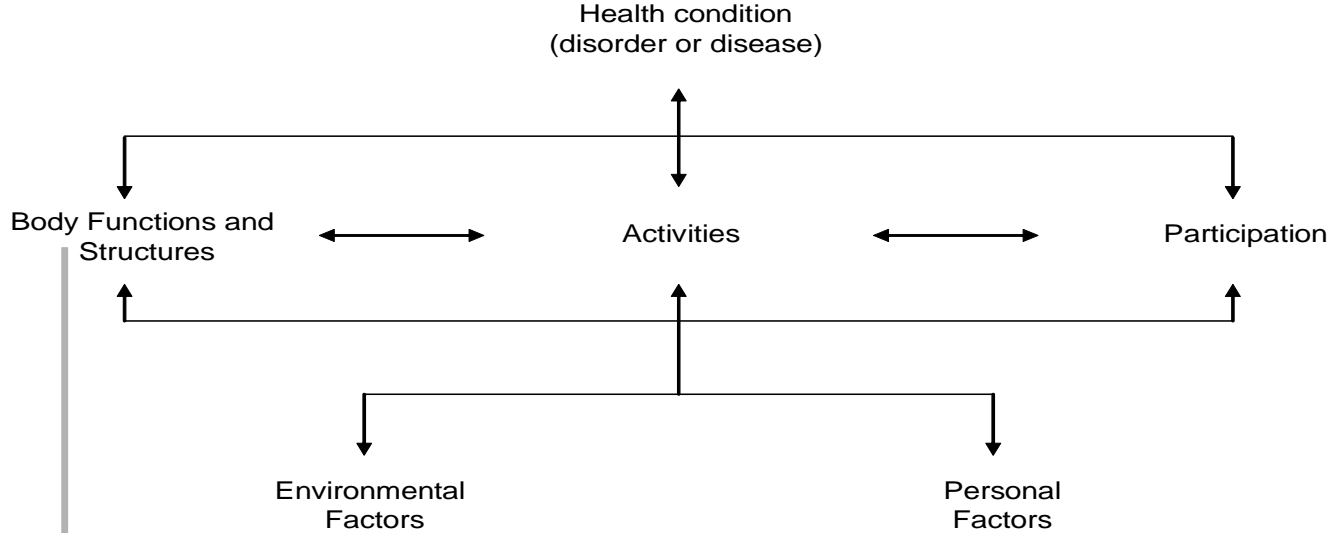

|        |                                   |                                       |
|--------|-----------------------------------|---------------------------------------|
| b2     | <i>Sensory functions and pain</i> | (ICF chapter)                         |
| b210   | Seeing functions                  | (2 <sup>nd</sup> -level ICF category) |
| b2102  | Quality of vision                 | (3 <sup>rd</sup> -level ICF category) |
| b21022 | Contrast sensitivity              | (4 <sup>th</sup> -level ICF category) |
